# Supplementary material
Source: publisher figshare collection journal article supplement (https://acs.figshare.com/ndownloader/files/4182814)
Supplement: Supplementary file 1 [file 4182814]

 
data_shelxl 
 
_audit_creation_method            SHELXL-97 
_chemical_name_systematic 
; 
 ? 
; 
_chemical_name_common             ? 
_chemical_melting_point           ? 
_chemical_formula_moiety          ? 
_chemical_formula_sum 
 'C26 H29 N O6 S' 
_chemical_formula_weight          483.56 
 
loop_ 
 _atom_type_symbol 
 _atom_type_description 
 _atom_type_scat_dispersion_real 
 _atom_type_scat_dispersion_imag 
 _atom_type_scat_source 
 'C'  'C'   0.0033   0.0016 
 'International Tables Vol C Tables 4.2.6.8 and 6.1.1.4' 
 'H'  'H'   0.0000   0.0000 
 'International Tables Vol C Tables 4.2.6.8 and 6.1.1.4' 
 'N'  'N'   0.0061   0.0033 
 'International Tables Vol C Tables 4.2.6.8 and 6.1.1.4' 
 'O'  'O'   0.0106   0.0060 
 'International Tables Vol C Tables 4.2.6.8 and 6.1.1.4' 
 'S'  'S'   0.1246   0.1234 
 'International Tables Vol C Tables 4.2.6.8 and 6.1.1.4' 
 
_symmetry_cell_setting           'Monoclinic'
_symmetry_space_group_name_H-M   'P2(1)/c  '
loop_ 
 _symmetry_equiv_pos_as_xyz 
 'x, y, z' 
 '-x, y+1/2, -z+1/2' 
 '-x, -y, -z' 
 'x, -y-1/2, z-1/2' 
 
_cell_length_a                    9.6511(8) 
_cell_length_b                    21.4131(18) 
_cell_length_c                    11.8730(10) 
_cell_angle_alpha                 90.00 
_cell_angle_beta                  107.0020(10) 
_cell_angle_gamma                 90.00 
_cell_volume                      2346.4(3) 
_cell_formula_units_Z             4 
_cell_measurement_temperature     123 
_cell_measurement_reflns_used    6351
_cell_measurement_theta_min        2.40
_cell_measurement_theta_max       27.49
_exptl_crystal_description        'block'
_exptl_crystal_colour             'colorless'
_exptl_crystal_size_max           0.20 
_exptl_crystal_size_mid           0.20 
_exptl_crystal_size_min           0.20 
_exptl_crystal_density_meas       ? 
_exptl_crystal_density_diffrn     1.369 
_exptl_crystal_density_method     'not measured' 
_exptl_crystal_F_000              1024 
_exptl_absorpt_coefficient_mu     0.181 
_exptl_absorpt_correction_type    empirical
_exptl_absorpt_correction_T_min   0.9646 
_exptl_absorpt_correction_T_max   0.9646 
_exptl_absorpt_process_details    
;
SADABS Sheldrick 1996
;
_exptl_special_details 
; 
 ? 
; 
 
_diffrn_ambient_temperature       123 
_diffrn_radiation_wavelength      0.71073 
_diffrn_radiation_type            MoK\a 
_diffrn_radiation_source          'Bruker TXS fine-focus rotating anode' 
_diffrn_radiation_monochromator   'Bruker Helios multilayer confocal mirror' 
_diffrn_measurement_device_type   'Bruker APEXII CCD area detector' 
_diffrn_measurement_method        'phi and omega scans' 
_diffrn_detector_area_resol_mean  8.333
_diffrn_reflns_number             13095 
_diffrn_reflns_av_R_equivalents   0.0247 
_diffrn_reflns_av_sigmaI/netI     0.0283 
_diffrn_reflns_limit_h_min        -12 
_diffrn_reflns_limit_h_max        11 
_diffrn_reflns_limit_k_min        -27 
_diffrn_reflns_limit_k_max        26 
_diffrn_reflns_limit_l_min        -15 
_diffrn_reflns_limit_l_max        14 
_diffrn_reflns_theta_min          1.90 
_diffrn_reflns_theta_max          27.51 
_reflns_number_total              5324 
_reflns_number_gt                 4675 
_reflns_threshold_expression      >2sigma(I) 
 
_computing_data_collection        'APEX2 (Bruker AXS, 2006)'
_computing_cell_refinement        'APEX2 (Bruker AXS, 2006)'
_computing_data_reduction         'SAINT (Bruker AXS, 2004)'
_computing_structure_solution     'SHELXS-97 (Sheldrick, 1997)'
_computing_structure_refinement   'SHELXL-97 (Sheldrick, 1997)'
_computing_molecular_graphics     'XSHEL (Bruker AXS,2002)'
_computing_publication_material   'XCIF (Bruker AXS, 2001)' 
_refine_special_details 
; 
 Refinement of F^2^ against ALL reflections.  The weighted R-factor wR and 
 goodness of fit S are based on F^2^, conventional R-factors R are based 
 on F, with F set to zero for negative F^2^. The threshold expression of 
 F^2^ > 2sigma(F^2^) is used only for calculating R-factors(gt) etc. and is 
 not relevant to the choice of reflections for refinement.  R-factors based 
 on F^2^ are statistically about twice as large as those based on F, and R- 
 factors based on ALL data will be even larger. 
; 
 
_refine_ls_structure_factor_coef  Fsqd  
_refine_ls_matrix_type            full 
_refine_ls_weighting_scheme       calc  
_refine_ls_weighting_details 
 'calc w=1/[\s^2^(Fo^2^)+(0.0546P)^2^+1.1024P] where P=(Fo^2^+2Fc^2^)/3' 
_atom_sites_solution_primary      direct 
_atom_sites_solution_secondary    difmap 
_atom_sites_solution_hydrogens    geom 
_refine_ls_hydrogen_treatment     constr
_refine_ls_extinction_method      none 
_refine_ls_extinction_coef        ? 
_refine_ls_number_reflns          5324 
_refine_ls_number_parameters      312 
_refine_ls_number_restraints      0 
_refine_ls_R_factor_all           0.0446 
_refine_ls_R_factor_gt            0.0388 
_refine_ls_wR_factor_ref          0.1059 
_refine_ls_wR_factor_gt           0.1017 
_refine_ls_goodness_of_fit_ref    1.031 
_refine_ls_restrained_S_all       1.031 
_refine_ls_shift/su_max           0.001 
_refine_ls_shift/su_mean          0.000 
 
loop_ 
 _atom_site_label 
 _atom_site_type_symbol 
 _atom_site_fract_x 
 _atom_site_fract_y 
 _atom_site_fract_z 
 _atom_site_U_iso_or_equiv 
 _atom_site_adp_type 
 _atom_site_occupancy 
 _atom_site_symmetry_multiplicity 
 _atom_site_calc_flag 
 _atom_site_refinement_flags 
 _atom_site_disorder_assembly 
 _atom_site_disorder_group 
C1 C 0.57666(16) 0.71693(6) 0.81656(12) 0.0192(3) Uani 1 1 d . . . 
H1A H 0.5618 0.7330 0.7357 0.023 Uiso 1 1 calc R . . 
H1B H 0.6389 0.6794 0.8260 0.023 Uiso 1 1 calc R . . 
C2 C 0.35130(16) 0.74617(6) 0.87272(12) 0.0192(3) Uani 1 1 d . . . 
H2 H 0.2683 0.7240 0.8895 0.023 Uiso 1 1 calc R . . 
C3 C 0.44538(16) 0.77319(7) 0.98928(12) 0.0210(3) Uani 1 1 d . . . 
H3A H 0.3939 0.8088 1.0122 0.025 Uiso 1 1 calc R . . 
H3B H 0.4600 0.7409 1.0514 0.025 Uiso 1 1 calc R . . 
C4 C 0.59120(16) 0.79513(6) 0.98205(12) 0.0193(3) Uani 1 1 d . . . 
C5 C 0.66692(17) 0.84278(7) 1.05394(12) 0.0230(3) Uani 1 1 d . . . 
H5 H 0.6236 0.8636 1.1057 0.028 Uiso 1 1 calc R . . 
C6 C 0.80488(17) 0.86046(7) 1.05149(12) 0.0238(3) Uani 1 1 d . . . 
H6 H 0.8546 0.8932 1.1010 0.029 Uiso 1 1 calc R . . 
C7 C 0.87001(16) 0.83013(6) 0.97640(12) 0.0212(3) Uani 1 1 d . . . 
C8 C 0.79258(16) 0.78320(6) 0.90126(12) 0.0190(3) Uani 1 1 d . . . 
C9 C 0.65480(15) 0.76612(6) 0.90378(11) 0.0180(3) Uani 1 1 d . . . 
C10 C 0.87545(19) 0.78579(8) 0.73136(14) 0.0290(3) Uani 1 1 d . . . 
H10A H 0.7841 0.8057 0.6877 0.043 Uiso 1 1 calc R . . 
H10B H 0.9077 0.7578 0.6788 0.043 Uiso 1 1 calc R . . 
H10C H 0.9491 0.8180 0.7618 0.043 Uiso 1 1 calc R . . 
C11 C 1.08572(18) 0.89072(7) 1.04256(14) 0.0293(3) Uani 1 1 d . . . 
H11A H 1.0344 0.9304 1.0205 0.044 Uiso 1 1 calc R . . 
H11B H 1.1826 0.8938 1.0323 0.044 Uiso 1 1 calc R . . 
H11C H 1.0944 0.8814 1.1251 0.044 Uiso 1 1 calc R . . 
C12 C 0.28728(15) 0.79414(6) 0.77605(12) 0.0195(3) Uani 1 1 d . . . 
C13 C 0.29525(16) 0.85831(7) 0.79936(13) 0.0224(3) Uani 1 1 d . . . 
H13 H 0.3519 0.8730 0.8742 0.027 Uiso 1 1 calc R . . 
C14 C 0.22167(17) 0.90078(7) 0.71474(14) 0.0238(3) Uani 1 1 d . . . 
C15 C 0.13551(16) 0.87984(7) 0.60430(13) 0.0231(3) Uani 1 1 d . . . 
C16 C 0.13055(16) 0.81638(7) 0.57942(13) 0.0218(3) Uani 1 1 d . . . 
H16 H 0.0753 0.8016 0.5042 0.026 Uiso 1 1 calc R . . 
C17 C 0.20697(16) 0.77410(6) 0.66513(12) 0.0203(3) Uani 1 1 d . . . 
H17 H 0.2037 0.7308 0.6469 0.024 Uiso 1 1 calc R . . 
C18 C 0.3213(2) 0.98765(8) 0.83778(16) 0.0389(4) Uani 1 1 d . . . 
H18A H 0.2902 0.9724 0.9043 0.058 Uiso 1 1 calc R . . 
H18B H 0.3194 1.0334 0.8367 0.058 Uiso 1 1 calc R . . 
H18C H 0.4201 0.9731 0.8460 0.058 Uiso 1 1 calc R . . 
C19 C -0.03154(18) 0.90505(8) 0.41869(15) 0.0314(4) Uani 1 1 d . . . 
H19A H 0.0245 0.8839 0.3732 0.047 Uiso 1 1 calc R . . 
H19B H -0.0813 0.9413 0.3745 0.047 Uiso 1 1 calc R . . 
H19C H -0.1033 0.8761 0.4328 0.047 Uiso 1 1 calc R . . 
C20 C 0.51777(15) 0.59358(6) 0.96352(12) 0.0187(3) Uani 1 1 d . . . 
C21 C 0.63330(16) 0.55609(6) 0.95979(13) 0.0220(3) Uani 1 1 d . . . 
H21 H 0.6470 0.5450 0.8863 0.026 Uiso 1 1 calc R . . 
C22 C 0.72909(17) 0.53479(7) 1.06456(14) 0.0250(3) Uani 1 1 d . . . 
H22 H 0.8082 0.5089 1.0623 0.030 Uiso 1 1 calc R . . 
C23 C 0.70995(17) 0.55106(7) 1.17281(13) 0.0245(3) Uani 1 1 d . . . 
C24 C 0.59089(17) 0.58775(7) 1.17424(13) 0.0246(3) Uani 1 1 d . . . 
H24 H 0.5761 0.5984 1.2475 0.030 Uiso 1 1 calc R . . 
C25 C 0.49404(16) 0.60891(7) 1.07080(13) 0.0218(3) Uani 1 1 d . . . 
H25 H 0.4127 0.6334 1.0727 0.026 Uiso 1 1 calc R . . 
C26 C 0.8178(2) 0.52956(8) 1.28567(15) 0.0359(4) Uani 1 1 d . . . 
H26A H 0.8609 0.4899 1.2720 0.054 Uiso 1 1 calc R . . 
H26B H 0.7684 0.5237 1.3462 0.054 Uiso 1 1 calc R . . 
H26C H 0.8941 0.5611 1.3121 0.054 Uiso 1 1 calc R . . 
N1 N 0.43589(13) 0.69882(5) 0.83028(10) 0.0185(2) Uani 1 1 d . . . 
O1 O 0.25445(11) 0.61928(5) 0.83544(9) 0.0235(2) Uani 1 1 d . . . 
O2 O 0.44211(12) 0.59655(5) 0.73559(9) 0.0237(2) Uani 1 1 d . . . 
O3 O 0.85402(12) 0.75047(5) 0.82809(9) 0.0228(2) Uani 1 1 d . . . 
O4 O 1.00655(12) 0.84186(5) 0.96925(9) 0.0255(2) Uani 1 1 d . . . 
O5 O 0.22605(14) 0.96442(5) 0.73076(11) 0.0331(3) Uani 1 1 d . . . 
O6 O 0.06404(12) 0.92533(5) 0.52916(10) 0.0295(3) Uani 1 1 d . . . 
S1 S 0.40140(4) 0.624421(15) 0.83164(3) 0.01788(10) Uani 1 1 d . . . 
 
loop_ 
 _atom_site_aniso_label 
 _atom_site_aniso_U_11 
 _atom_site_aniso_U_22 
 _atom_site_aniso_U_33 
 _atom_site_aniso_U_23 
 _atom_site_aniso_U_13 
 _atom_site_aniso_U_12 
C1 0.0230(7) 0.0183(6) 0.0180(6) -0.0019(5) 0.0084(5) -0.0025(5) 
C2 0.0227(7) 0.0162(6) 0.0209(7) 0.0009(5) 0.0098(5) 0.0007(5) 
C3 0.0279(8) 0.0198(7) 0.0176(6) 0.0002(5) 0.0100(6) 0.0003(6) 
C4 0.0254(7) 0.0171(6) 0.0156(6) 0.0019(5) 0.0061(5) 0.0005(5) 
C5 0.0330(8) 0.0191(7) 0.0181(7) -0.0024(5) 0.0094(6) 0.0004(6) 
C6 0.0317(8) 0.0192(7) 0.0187(7) -0.0035(5) 0.0045(6) -0.0037(6) 
C7 0.0243(7) 0.0179(6) 0.0196(7) 0.0021(5) 0.0035(5) -0.0019(5) 
C8 0.0249(7) 0.0162(6) 0.0160(6) 0.0012(5) 0.0060(5) 0.0011(5) 
C9 0.0241(7) 0.0148(6) 0.0142(6) 0.0013(5) 0.0040(5) -0.0001(5) 
C10 0.0376(9) 0.0278(8) 0.0267(8) -0.0032(6) 0.0175(7) -0.0050(7) 
C11 0.0276(8) 0.0257(8) 0.0291(8) -0.0027(6) -0.0003(6) -0.0072(6) 
C12 0.0206(7) 0.0170(6) 0.0230(7) 0.0020(5) 0.0097(6) 0.0009(5) 
C13 0.0250(7) 0.0186(7) 0.0248(7) -0.0010(5) 0.0091(6) -0.0009(6) 
C14 0.0267(8) 0.0150(6) 0.0327(8) 0.0016(5) 0.0132(6) 0.0006(6) 
C15 0.0211(7) 0.0207(7) 0.0297(7) 0.0088(6) 0.0106(6) 0.0037(5) 
C16 0.0202(7) 0.0229(7) 0.0230(7) 0.0017(5) 0.0074(6) -0.0003(6) 
C17 0.0226(7) 0.0155(6) 0.0245(7) 0.0004(5) 0.0096(6) 0.0003(5) 
C18 0.0595(12) 0.0178(7) 0.0423(10) -0.0048(7) 0.0191(9) -0.0039(7) 
C19 0.0255(8) 0.0337(9) 0.0339(8) 0.0111(7) 0.0067(7) 0.0068(7) 
C20 0.0212(7) 0.0147(6) 0.0193(6) 0.0035(5) 0.0046(5) -0.0008(5) 
C21 0.0259(8) 0.0173(6) 0.0239(7) 0.0001(5) 0.0092(6) 0.0006(5) 
C22 0.0246(8) 0.0183(7) 0.0310(8) 0.0017(6) 0.0066(6) 0.0040(6) 
C23 0.0301(8) 0.0154(6) 0.0239(7) 0.0024(5) 0.0014(6) -0.0020(6) 
C24 0.0339(9) 0.0200(7) 0.0206(7) 0.0011(5) 0.0089(6) -0.0016(6) 
C25 0.0247(7) 0.0186(6) 0.0237(7) 0.0018(5) 0.0094(6) 0.0015(5) 
C26 0.0446(10) 0.0238(8) 0.0294(8) 0.0007(6) -0.0046(7) 0.0043(7) 
N1 0.0217(6) 0.0142(5) 0.0205(6) 0.0007(4) 0.0077(5) -0.0005(4) 
O1 0.0222(5) 0.0197(5) 0.0274(5) 0.0021(4) 0.0052(4) -0.0024(4) 
O2 0.0307(6) 0.0193(5) 0.0202(5) -0.0024(4) 0.0060(4) -0.0012(4) 
O3 0.0279(6) 0.0190(5) 0.0242(5) -0.0027(4) 0.0121(4) -0.0012(4) 
O4 0.0244(5) 0.0244(5) 0.0265(5) -0.0051(4) 0.0055(4) -0.0058(4) 
O5 0.0439(7) 0.0148(5) 0.0400(7) 0.0015(4) 0.0111(5) 0.0022(5) 
O6 0.0296(6) 0.0222(5) 0.0353(6) 0.0107(4) 0.0072(5) 0.0048(4) 
S1 0.02084(19) 0.01419(16) 0.01765(17) 0.00087(11) 0.00413(13) -0.00109(12) 
 
_geom_special_details 
; 
 All esds (except the esd in the dihedral angle between two l.s. planes) 
 are estimated using the full covariance matrix.  The cell esds are taken 
 into account individually in the estimation of esds in distances, angles 
 and torsion angles; correlations between esds in cell parameters are only 
 used when they are defined by crystal symmetry.  An approximate (isotropic) 
 treatment of cell esds is used for estimating esds involving l.s. planes. 
; 
 
loop_ 
 _geom_bond_atom_site_label_1 
 _geom_bond_atom_site_label_2 
 _geom_bond_distance 
 _geom_bond_site_symmetry_2 
 _geom_bond_publ_flag 
C1 N1 1.4671(18) . ? 
C1 C9 1.5146(18) . ? 
C1 H1A 0.9900 . ? 
C1 H1B 0.9900 . ? 
C2 N1 1.4796(17) . ? 
C2 C3 1.5296(19) . ? 
C2 C12 1.5296(19) . ? 
C2 H2 1.0000 . ? 
C3 C4 1.510(2) . ? 
C3 H3A 0.9900 . ? 
C3 H3B 0.9900 . ? 
C4 C5 1.392(2) . ? 
C4 C9 1.4000(19) . ? 
C5 C6 1.393(2) . ? 
C5 H5 0.9500 . ? 
C6 C7 1.393(2) . ? 
C6 H6 0.9500 . ? 
C7 O4 1.3683(18) . ? 
C7 C8 1.4050(19) . ? 
C8 O3 1.3779(17) . ? 
C8 C9 1.388(2) . ? 
C10 O3 1.4397(18) . ? 
C10 H10A 0.9800 . ? 
C10 H10B 0.9800 . ? 
C10 H10C 0.9800 . ? 
C11 O4 1.4308(18) . ? 
C11 H11A 0.9800 . ? 
C11 H11B 0.9800 . ? 
C11 H11C 0.9800 . ? 
C12 C17 1.386(2) . ? 
C12 C13 1.3992(19) . ? 
C13 C14 1.387(2) . ? 
C13 H13 0.9500 . ? 
C14 O5 1.3749(17) . ? 
C14 C15 1.405(2) . ? 
C15 O6 1.3640(17) . ? 
C15 C16 1.389(2) . ? 
C16 C17 1.4001(19) . ? 
C16 H16 0.9500 . ? 
C17 H17 0.9500 . ? 
C18 O5 1.423(2) . ? 
C18 H18A 0.9800 . ? 
C18 H18B 0.9800 . ? 
C18 H18C 0.9800 . ? 
C19 O6 1.433(2) . ? 
C19 H19A 0.9800 . ? 
C19 H19B 0.9800 . ? 
C19 H19C 0.9800 . ? 
C20 C21 1.385(2) . ? 
C20 C25 1.398(2) . ? 
C20 S1 1.7666(14) . ? 
C21 C22 1.392(2) . ? 
C21 H21 0.9500 . ? 
C22 C23 1.395(2) . ? 
C22 H22 0.9500 . ? 
C23 C24 1.396(2) . ? 
C23 C26 1.508(2) . ? 
C24 C25 1.384(2) . ? 
C24 H24 0.9500 . ? 
C25 H25 0.9500 . ? 
C26 H26A 0.9800 . ? 
C26 H26B 0.9800 . ? 
C26 H26C 0.9800 . ? 
N1 S1 1.6285(12) . ? 
O1 S1 1.4364(11) . ? 
O2 S1 1.4397(10) . ? 
 
loop_ 
 _geom_angle_atom_site_label_1 
 _geom_angle_atom_site_label_2 
 _geom_angle_atom_site_label_3 
 _geom_angle 
 _geom_angle_site_symmetry_1 
 _geom_angle_site_symmetry_3 
 _geom_angle_publ_flag 
N1 C1 C9 113.58(11) . . ? 
N1 C1 H1A 108.8 . . ? 
C9 C1 H1A 108.8 . . ? 
N1 C1 H1B 108.8 . . ? 
C9 C1 H1B 108.8 . . ? 
H1A C1 H1B 107.7 . . ? 
N1 C2 C3 109.07(12) . . ? 
N1 C2 C12 110.29(11) . . ? 
C3 C2 C12 115.31(12) . . ? 
N1 C2 H2 107.3 . . ? 
C3 C2 H2 107.3 . . ? 
C12 C2 H2 107.3 . . ? 
C4 C3 C2 112.51(11) . . ? 
C4 C3 H3A 109.1 . . ? 
C2 C3 H3A 109.1 . . ? 
C4 C3 H3B 109.1 . . ? 
C2 C3 H3B 109.1 . . ? 
H3A C3 H3B 107.8 . . ? 
C5 C4 C9 118.60(13) . . ? 
C5 C4 C3 121.60(13) . . ? 
C9 C4 C3 119.78(12) . . ? 
C4 C5 C6 121.33(13) . . ? 
C4 C5 H5 119.3 . . ? 
C6 C5 H5 119.3 . . ? 
C7 C6 C5 119.98(13) . . ? 
C7 C6 H6 120.0 . . ? 
C5 C6 H6 120.0 . . ? 
O4 C7 C6 125.26(13) . . ? 
O4 C7 C8 115.78(13) . . ? 
C6 C7 C8 118.96(14) . . ? 
O3 C8 C9 118.11(12) . . ? 
O3 C8 C7 121.14(13) . . ? 
C9 C8 C7 120.65(13) . . ? 
C8 C9 C4 120.41(13) . . ? 
C8 C9 C1 117.21(12) . . ? 
C4 C9 C1 122.35(13) . . ? 
O3 C10 H10A 109.5 . . ? 
O3 C10 H10B 109.5 . . ? 
H10A C10 H10B 109.5 . . ? 
O3 C10 H10C 109.5 . . ? 
H10A C10 H10C 109.5 . . ? 
H10B C10 H10C 109.5 . . ? 
O4 C11 H11A 109.5 . . ? 
O4 C11 H11B 109.5 . . ? 
H11A C11 H11B 109.5 . . ? 
O4 C11 H11C 109.5 . . ? 
H11A C11 H11C 109.5 . . ? 
H11B C11 H11C 109.5 . . ? 
C17 C12 C13 118.36(13) . . ? 
C17 C12 C2 119.72(12) . . ? 
C13 C12 C2 121.62(13) . . ? 
C14 C13 C12 120.91(14) . . ? 
C14 C13 H13 119.5 . . ? 
C12 C13 H13 119.5 . . ? 
O5 C14 C13 124.13(14) . . ? 
O5 C14 C15 115.54(13) . . ? 
C13 C14 C15 120.32(13) . . ? 
O6 C15 C16 125.47(14) . . ? 
O6 C15 C14 115.51(13) . . ? 
C16 C15 C14 119.01(13) . . ? 
C15 C16 C17 120.01(14) . . ? 
C15 C16 H16 120.0 . . ? 
C17 C16 H16 120.0 . . ? 
C12 C17 C16 121.31(13) . . ? 
C12 C17 H17 119.3 . . ? 
C16 C17 H17 119.3 . . ? 
O5 C18 H18A 109.5 . . ? 
O5 C18 H18B 109.5 . . ? 
H18A C18 H18B 109.5 . . ? 
O5 C18 H18C 109.5 . . ? 
H18A C18 H18C 109.5 . . ? 
H18B C18 H18C 109.5 . . ? 
O6 C19 H19A 109.5 . . ? 
O6 C19 H19B 109.5 . . ? 
H19A C19 H19B 109.5 . . ? 
O6 C19 H19C 109.5 . . ? 
H19A C19 H19C 109.5 . . ? 
H19B C19 H19C 109.5 . . ? 
C21 C20 C25 120.88(13) . . ? 
C21 C20 S1 119.83(11) . . ? 
C25 C20 S1 119.27(11) . . ? 
C20 C21 C22 119.46(13) . . ? 
C20 C21 H21 120.3 . . ? 
C22 C21 H21 120.3 . . ? 
C21 C22 C23 120.62(14) . . ? 
C21 C22 H22 119.7 . . ? 
C23 C22 H22 119.7 . . ? 
C22 C23 C24 118.88(13) . . ? 
C22 C23 C26 119.97(15) . . ? 
C24 C23 C26 121.16(14) . . ? 
C25 C24 C23 121.20(14) . . ? 
C25 C24 H24 119.4 . . ? 
C23 C24 H24 119.4 . . ? 
C24 C25 C20 118.93(14) . . ? 
C24 C25 H25 120.5 . . ? 
C20 C25 H25 120.5 . . ? 
C23 C26 H26A 109.5 . . ? 
C23 C26 H26B 109.5 . . ? 
H26A C26 H26B 109.5 . . ? 
C23 C26 H26C 109.5 . . ? 
H26A C26 H26C 109.5 . . ? 
H26B C26 H26C 109.5 . . ? 
C1 N1 C2 118.54(11) . . ? 
C1 N1 S1 117.28(9) . . ? 
C2 N1 S1 122.17(9) . . ? 
C8 O3 C10 115.12(11) . . ? 
C7 O4 C11 116.69(12) . . ? 
C14 O5 C18 117.12(13) . . ? 
C15 O6 C19 116.71(12) . . ? 
O1 S1 O2 119.59(6) . . ? 
O1 S1 N1 106.37(6) . . ? 
O2 S1 N1 107.08(6) . . ? 
O1 S1 C20 108.73(6) . . ? 
O2 S1 C20 107.28(7) . . ? 
N1 S1 C20 107.20(6) . . ? 
 
_diffrn_measured_fraction_theta_max    0.984 
_diffrn_reflns_theta_full              27.51 
_diffrn_measured_fraction_theta_full   0.984 
_refine_diff_density_max    0.484 
_refine_diff_density_min   -0.453 
_refine_diff_density_rms    0.051 
